# Supplementary material for: Controllable synthesis and thermoelectric transport properties of binary-phased PbTe/PbSe nanocrystals
Source: Royal Society of Chemistry journal article supplement (doi:10.1039/c2ce25137j), 2012-01-01
Supplement: c2ce25137j.pdf [file c2ce25137j.pdf]

## Controllable synthesis and thermoelectric transport properties of binary-phased PbTe/PbSe nanocrystals†

Rencheng Jin, Gang Chen,\* Jian Pei, Jingxue Sun, and Qun Wang

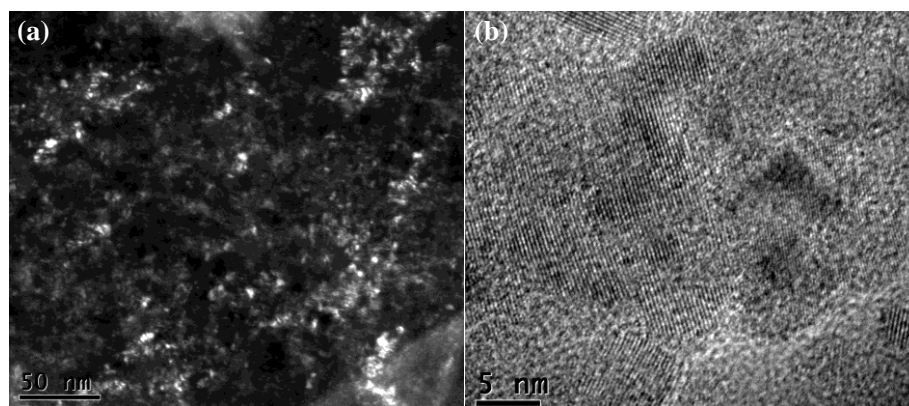

Fig. S1 (a) Dark field image for the single PbTe/PbSe nanoplate, (b) corresponding HRTEM image taken from the corner of the nanoplate.
